# Supplementary material for: Simultaneous Influence of Gradients in Natural Organic Matter and Abiotic Parameters on the Behavior of Silver Nanoparticles in the Transition Zone from Freshwater to Saltwater Environments
Source: MDPI journal article supplement (doi:10.3390/nano12020296), 2022-01-17
Supplement: s1 [file s1]

# Simultaneous Influence of Gradients in Natural Organic Matter and Abiotic Parameters on the Behavior of Silver Nanoparticles in the Transition Zone from Freshwater to Saltwater Environments

Ivana Čarapar, Lara Jurković, Dijana Pavičić-Hamer, Bojan Hamer and Daniel Mark Lyons \*

Center for Marine Research, Ruđer Bošković Institute, G. Paliaga 5, 52210 Rovinj, Croatia;  
 ivana.hazdovac@irb.hr (I.Č.); lara.jurkovic@irb.hr (L.J.); dpavicic@irb.hr (D.P.-H.); bhamer@irb.hr (B.H.)  
 \* Correspondence: lyons@irb.hr; Tel.: +385-52-804725; Fax: +385-52-804780

**Table S1.** Calculated rates of silver ion ( $\text{Ag}^+$ ) release from AgNP.

| O <sub>2</sub> saturation | Salinity | pH  | $\gamma/\text{mg L}^{-1}$ | normal<br>[Ag <sup>+</sup> ]/mg L <sup>-1</sup> | normal<br>k / day <sup>-1</sup> | normal<br>R <sup>2</sup> | reduced<br>[Ag <sup>+</sup> ]/mg L <sup>-1</sup> | reduced<br>k / day <sup>-1</sup> | reduced<br>R <sup>2</sup> |
|---------------------------|----------|-----|---------------------------|-------------------------------------------------|---------------------------------|--------------------------|--------------------------------------------------|----------------------------------|---------------------------|
| HA                        | 0        | 6.6 | 0.01                      | 4.26386                                         | 0.06542                         | 0.99491                  | 0.71808                                          | 0.36448                          | 0.9043                    |
|                           |          |     | 0.1                       | 3.00768                                         | 0.06837                         | 0.99163                  | 0.49861                                          | 0.25947                          | 0.9784                    |
|                           |          |     | 1                         | 4.0046                                          | 0.0563                          | 0.99535                  | 0.47398                                          | 0.24319                          | 0.981                     |
|                           |          |     | 10                        | 4.01156                                         | 0.06795                         | 0.99599                  | 0.58972                                          | 0.35993                          | 0.9694                    |
| Alg                       | 0        | 6.6 | 0.01                      | 1.88644                                         | 0.13676                         | 0.98757                  | 0.62524                                          | 0.26701                          | 0.94758                   |
|                           |          |     | 0.1                       | 2.20435                                         | 0.13862                         | 0.99553                  | 0.69834                                          | 0.1761                           | 0.91886                   |
|                           |          |     | 1                         | 2.08107                                         | 0.1218                          | 0.99907                  | 0.1227                                           | 0.58013                          | 0.89572                   |
|                           |          |     | 10                        | 1.94834                                         | 0.15732                         | 0.99902                  | 0.72305                                          | 0.17493                          | 0.94757                   |
| BSA                       | 0        | 6.6 | 0.1                       | 2.06837                                         | 0.12506                         | 0.99784                  | 0.63172                                          | 0.58238                          | 0.95044                   |
|                           |          |     | 1                         | 1.65528                                         | 0.20337                         | 0.99713                  | 2.41708                                          | 0.12474                          | 0.9918                    |
|                           |          |     | 10                        | 1.60925                                         | 0.17866                         | 0.98817                  | 0.64408                                          | 0.49129                          | 0.98106                   |
|                           |          |     | 100                       | 2.41714                                         | 0.13705                         | 0.99127                  | 0.73788                                          | 0.34573                          | 0.96604                   |
| HA                        | 10       |     | 0.01                      | 4.72734                                         | 35.21259                        | 0.99998                  | 4.87819                                          | 27.36315                         | 0.99995                   |
|                           |          |     | 0.1                       | 4.65024                                         | 34.20346                        | 0.99999                  | 4.75578                                          | 27.46644                         | 0.99994                   |
|                           |          |     | 1                         | 4.60888                                         | 31.05399                        | 0.99999                  | 4.72369                                          | 26.21981                         | 0.99991                   |
|                           |          |     | 10                        | 4.42123                                         | 13.86086                        | 0.99985                  | 4.56098                                          | 15.47325                         | 0.99978                   |
| Alg                       | 10       |     | 0.01                      | 4.73616                                         | 35.25302                        | 0.99999                  | 4.75639                                          | 27.12472                         | 0.99995                   |
|                           |          |     | 0.1                       | 4.53847                                         | 30.39042                        | 0.99996                  | 4.79897                                          | 26.66101                         | 0.99995                   |
|                           |          |     | 1                         | 4.3324                                          | 8.99592                         | 0.96795                  | 4.29212                                          | 16.31648                         | 0.98692                   |
|                           |          |     | 10                        | 4.62939                                         | 0.97709                         | 0.99534                  | 4.35643                                          | 4.6009                           | 0.95333                   |
| BSA                       | 10       |     | 0.1                       | 4.61709                                         | 28.04514                        | 0.99998                  | 4.89036                                          | 24.93495                         | 0.99996                   |
|                           |          |     | 1                         | 4.68233                                         | 41.26388                        | 0.99999                  | 4.71183                                          | 27.65161                         | 0.99998                   |
|                           |          |     | 10                        | 1.93378                                         | 3.80545                         | 0.98461                  | 2.12601                                          | 5.13404                          | 0.9547                    |
|                           |          |     | 100                       | 0.82329                                         | 6.39518                         | 0.89183                  | 1.09851                                          | 0.28589                          | 0.82499                   |
| HA                        | 20       |     | 0.01                      | 4.75532                                         | 35.29339                        | 0.99999                  | 4.91043                                          | 24.15264                         | 0.99999                   |
|                           |          |     | 0.1                       | 4.67108                                         | 34.50134                        | 0.99999                  | 4.77433                                          | 24.43112                         | 1                         |
|                           |          |     | 1                         | 4.64173                                         | 31.21376                        | 0.99996                  | 4.74589                                          | 23.57208                         | 0.99997                   |
|                           |          |     | 10                        | 3.90511                                         | 20.66442                        | 0.99963                  | 4.10995                                          | 18.16369                         | 0.99972                   |
| Alg                       | 20       |     | 0.01                      | 4.7608                                          | 35.50314                        | 0.99999                  | 4.77296                                          | 24.41726                         | 0.99998                   |
|                           |          |     | 0.1                       | 4.51642                                         | 32.39285                        | 0.99989                  | 4.81524                                          | 23.4764                          | 0.99997                   |
|                           |          |     | 1                         | 4.42514                                         | 5.66634                         | 0.95438                  | 3.88812                                          | 8.32747                          | 0.90985                   |
|                           |          |     | 10                        | 4.75427                                         | 0.6499                          | 0.99709                  | 4.71273                                          | 0.64554                          | 0.98121                   |
| BSA                       | 20       |     | 0.1                       | 4.65496                                         | 32.91209                        | 0.99997                  | 4.90815                                          | 23.3393                          | 0.99998                   |

|         |    |     |       |          |          |         |          |          |         |
|---------|----|-----|-------|----------|----------|---------|----------|----------|---------|
|         |    |     | 1     | 4.67062  | 39.55747 | 0.99996 | 4.67746  | 31.32767 | 0.99994 |
|         |    |     | 10    | 2.67844  | 2.34583  | 0.93722 | 3.21959  | 9.14689  | 0.95602 |
|         |    |     | 100   | 0.99907  | 1.38794  | 0.80148 | 1.06456  | 0.42426  | 0.85536 |
| HA      | 38 | 7.8 | 0.01  | 4.76946  | 36.83918 | 0.99996 | 4.92321  | 31.73585 | 0.99999 |
|         |    |     | 0.1   | 4.68355  | 36.15017 | 0.99998 | 4.78057  | 31.5457  | 0.99999 |
|         |    |     | 1     | 4.63352  | 31.65206 | 0.99994 | 4.73373  | 27.75967 | 0.99994 |
|         |    |     | 10    | 4.46761  | 23.83701 | 0.99993 | 3.99665  | 20.92694 | 0.9718  |
|         |    |     |       |          |          |         |          |          |         |
| Alg     | 38 | 7.8 | 0.01  | 4.75441  | 22.43439 | 0.99999 | 4.78589  | 30.66561 | 1       |
|         |    |     | 0.1   | 4.55763  | 33.2791  | 0.99998 | 4.80991  | 28.5747  | 0.99998 |
|         |    |     | 1     | 4.42026  | 5.71489  | 0.95773 | 4.30664  | 6.19438  | 0.94581 |
|         |    |     | 10    | 4.72963  | 1.42608  | 0.99883 | 4.77509  | 1.27076  | 0.99415 |
|         |    |     |       |          |          |         |          |          |         |
| BSA     | 38 | 7.8 | 0.1   | 4.68415  | 31.50738 | 0.99998 | 4.92549  | 27.58061 | 0.99998 |
|         |    |     | 1     | 4.63488  | 33.52187 | 0.99981 | 4.68917  | 29.15859 | 0.99986 |
|         |    |     | 10    | 4.19977  | 1.14442  | 0.91675 | 4.12729  | 9.7064   | 0.93995 |
|         |    |     | 100   | 1.77517  | 0.56304  | 0.77829 | 1.48696  | 0.44778  | 0.89767 |
|         |    |     |       |          |          |         |          |          |         |
| BSA-Alg | 0  | 6.6 | 10–1  | 0.02557  | 0.61973  | 0.99985 | 1.86167  | 0.08721  | 0.99965 |
|         |    |     | 7.2   | 0.13971  | 0.13572  | 0.99993 | 106.894  | 6.55E–04 | 0.99949 |
|         |    |     | 7.8   | 36.10179 | 6.22E–04 | 0.99995 | 1.82914  | 2.82202  | 0.99958 |
| BSA-HA  | 0  | 6.6 | 10–10 | 0.02153  | 0.49209  | 0.99995 | 0.15984  | 3.06E–01 | 0.99995 |
|         |    |     | 7.2   | 29.26054 | 0.0014   | 0.9998  | 34.53339 | 4.28E–04 | 0.99946 |
|         |    |     | 7.8   | 41.64207 | 5.31E–04 | 0.99993 | 41.43086 | 0.00134  | 0.99977 |
| HA-Alg  | 0  | 6.6 | 10–1  | 186.3103 | 6.29E–04 | 0.99891 | 0.96049  | 2.69E–01 | 0.99997 |
|         |    |     | 7.2   | 0.36778  | 1.72E–01 | 0.99962 | 0.60519  | 6.92E–01 | 0.9998  |
|         |    |     | 7.8   | 0.86263  | 0.07875  | 0.99942 | 0.49419  | 1.02481  | 0.99994 |
| BSA-Alg | 10 | 6.6 | 10–1  | 0.90203  | 1.37246  | 0.9995  | 3.51889  | 1.7786   | 0.99763 |
|         |    |     | 7.2   | 0.33581  | 0.21995  | 0.99988 | 3.10131  | 2.91338  | 0.99953 |
|         |    |     | 7.8   | 0.48714  | 1.84551  | 0.9997  | 1.78769  | 2.09997  | 0.99905 |
| BSA-HA  | 10 | 6.6 | 10–10 | 2.69476  | 3.71309  | 0.99997 | 1.8096   | 1.75     | 0.99902 |
|         |    |     | 7.2   | 3.42527  | 4.67439  | 1       | 1.79082  | 2.11698  | 0.99921 |
|         |    |     | 7.8   | 2.45954  | 4.98157  | 0.99998 | 1.68286  | 2.09574  | 0.99902 |
| HA-Alg  | 10 | 6.6 | 10–1  | 2.88231  | 2.61434  | 0.99888 | 2.51553  | 2.63     | 0.99908 |
|         |    |     | 7.2   | 2.43551  | 4.1608   | 0.99999 | 2.65855  | 4.07949  | 0.9998  |
|         |    |     | 7.8   | 2.88472  | 5.70106  | 0.99998 | 2.48407  | 3.95385  | 0.99979 |
| BSA-Alg | 20 | 6.6 | 10–1  | 1.84725  | 1.5566   | 0.9993  | 3.31599  | 1.88799  | 0.99798 |
|         |    |     | 7.2   | 1.94802  | 0.98236  | 0.99778 | 4.62748  | 2.50908  | 0.99978 |
|         |    |     | 7.8   | 1.50485  | 2.07958  | 0.99968 | 1.60819  | 0.97712  | 0.99931 |
| BSA-HA  | 20 | 6.6 | 10–10 | 3.22649  | 3.88845  | 0.99997 | 1.74442  | 1.84022  | 0.9988  |
|         |    |     | 7.2   | 3.65715  | 4.25127  | 0.99999 | 2.0541   | 2.62143  | 0.99969 |
|         |    |     | 7.8   | 2.69144  | 4.23637  | 0.99999 | 1.79146  | 2.18254  | 0.99934 |
| HA-Alg  | 20 | 6.6 | 10–1  | 2.8368   | 2.3985   | 0.99733 | 2.29093  | 2.34084  | 0.99616 |
|         |    |     | 7.2   | 2.45024  | 3.29516  | 0.99948 | 2.63079  | 2.2775   | 0.99957 |
|         |    |     | 7.8   | 2.71351  | 3.97114  | 0.99953 | 2.32367  | 3.94754  | 0.99904 |
| BSA-Alg | 38 | 6.6 | 10–1  | 2.68056  | 1.87196  | 0.99831 | 3.49785  | 1.43084  | 0.99718 |
|         |    |     | 7.2   | 2.38819  | 2.55819  | 0.9995  | 3.67633  | 1.93955  | 0.99871 |
|         |    |     | 7.8   | 2.47729  | 2.55363  | 0.99928 | 1.88892  | 1.41292  | 0.99838 |
| BSA-HA  | 38 | 6.6 | 10–10 | 3.43427  | 3.82612  | 0.99999 | 2.03303  | 1.79615  | 0.99948 |
|         |    |     | 7.2   | 3.66484  | 5.09963  | 0.99998 | 1.84078  | 2.13164  | 0.99955 |
|         |    |     | 7.8   | 2.80625  | 5.35569  | 0.99998 | 1.72506  | 2.05725  | 0.99964 |
| HA-Alg  | 38 | 6.6 | 10–1  | 2.82934  | 2.41614  | 0.99997 | 2.38428  | 1.8825   | 0.99939 |
|         |    |     | 7.2   | 2.49552  | 1.6385   | 0.99816 | 2.83763  | 1.09793  | 0.99763 |
|         |    |     | 7.8   | 2.56386  | 3.13236  | 0.99997 | 2.28678  | 2.23551  | 0.99801 |

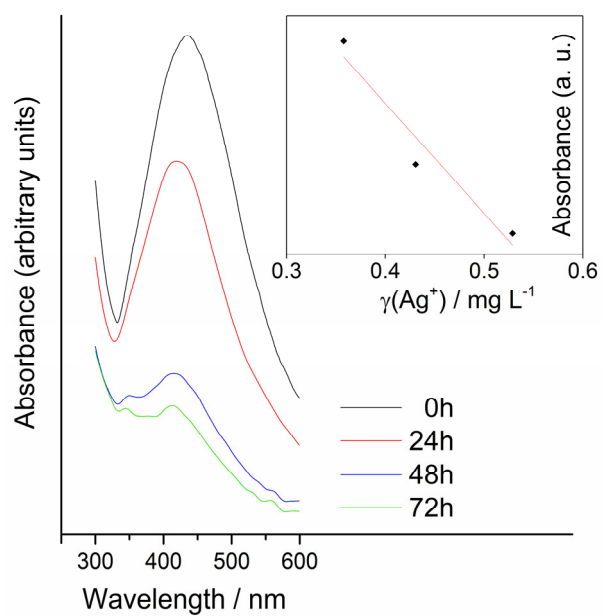

**Figure S1.** UV-vis absorption spectra for AgNP in ASW. Inset: Temporal change in surface plasmon resonance peak maximum as a function of measured Ag<sup>+</sup> concentration after 24, 48 and 72 hours. Linear fit  $y = -0.0414x + 0.0273$ ,  $R^2 = 0.9392$ .

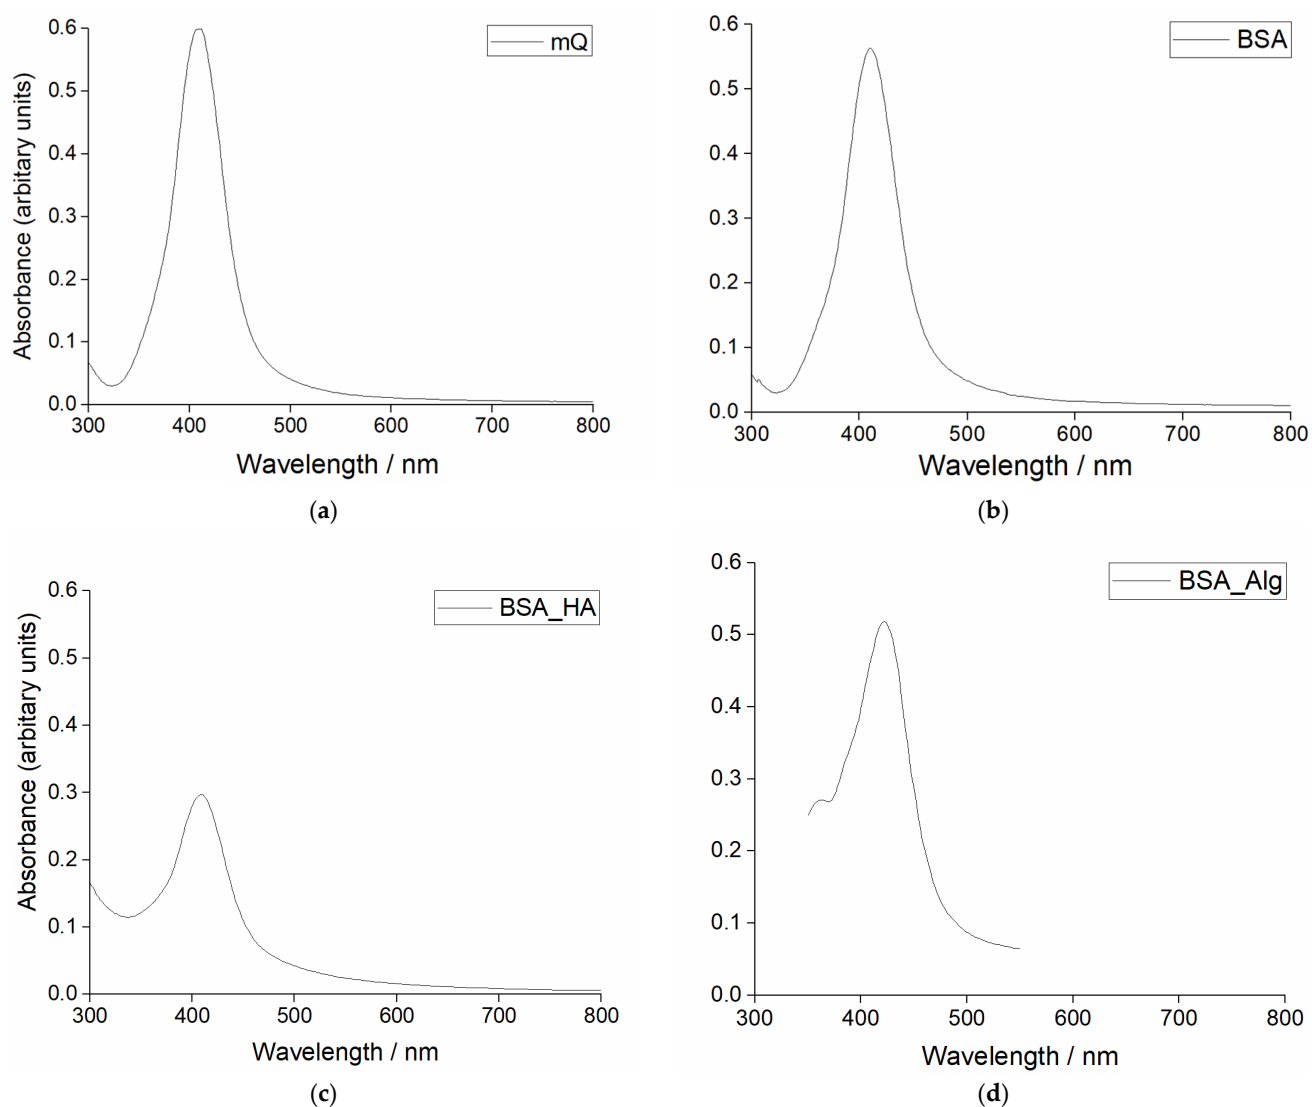

**Figure S2.** UV-vis absorption spectra of AgNP in (a) mQ water, and in ASW (S-38) after 5 min incubation with (b) BSA (10 mg L<sup>-1</sup>), (c) HA (10 mg L<sup>-1</sup>), and (d) Alg (1 mg L<sup>-1</sup>).

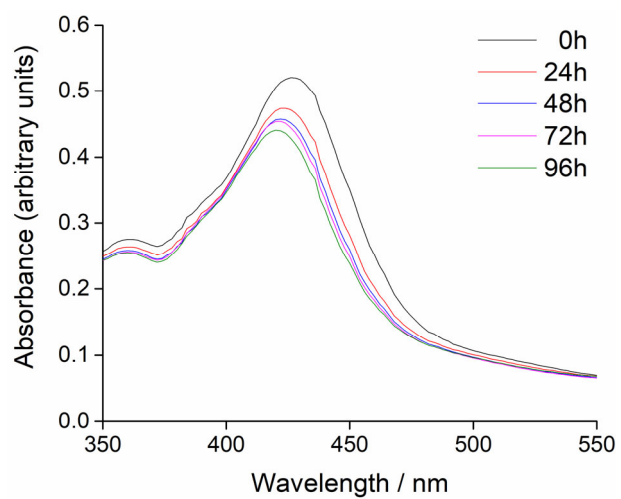

**Figure S3.** Temporal change of UV-vis absorption spectra of AgNP ( $5 \text{ mg L}^{-1}$ ) with BSA ( $100 \text{ mg L}^{-1}$ ) in ASW (S-38) over 4 days.
